# Supplementary material for: Effects of shepherds and dogs on livestock depredation by leopards (Panthera pardus) in north-eastern Iran
Source: PubMed Central journal article supplement (PMC5326547; doi:10.7717/peerj.3049), 2017-02-23
Supplement: peerj-05-3049-s001.pdf [file peerj-05-3049-s001.pdf]

**Table S1.** Information on 39 attacks of leopards (*Panthera pardus*) on sheep and goats in villages around Golestan National Park, Iran.

| Attack # | Village           | Number of sheep and goats killed per attack | Season | No. living small stock/village | Ethnic groups |         |         |         | Distance from village to protected areas, km | Presence (Yes) or absence (No) |      |                                 |
|----------|-------------------|---------------------------------------------|--------|--------------------------------|---------------|---------|---------|---------|----------------------------------------------|--------------------------------|------|---------------------------------|
|          |                   |                                             |        |                                | Turkmen       | Persian | Balochi | Kurdish |                                              | Shepherds                      | Dogs | Previous depredation in village |
| 1        | Bidak             | 1                                           | autumn | 6000                           |               |         |         | Yes     | 3.26                                         | Yes                            | Yes  | No                              |
| 2        | Dasht Shad        | 1                                           | autumn | 20000                          |               | Yes     |         | Yes     | 0.67                                         | Yes                            | Yes  | Yes                             |
| 3        |                   | 1                                           | winter |                                |               |         |         | Yes     |                                              | Yes                            |      |                                 |
| 4        | Domanli           | 5                                           | winter | 1000                           | Yes           |         |         |         | 0.28                                         | Yes                            | No   | Yes                             |
| 5        | Gharanki Jangel   | 2                                           | spring | 600                            | Yes           |         |         |         | 0.88                                         | Yes                            | Yes  | No                              |
| 6        | Ghareh Yesar Bala | 2                                           | summer | 300                            | Yes           |         | Yes     |         | 2.89                                         | Yes                            | Yes  | No                              |
| 7        | Ghodeneh Bala     | 4                                           | winter | 400                            | Yes           |         |         |         | 1.81                                         | No                             | No   | No                              |
| 8        | Ghoshcheshmeh     | 1                                           | spring | 600                            | Yes           |         |         |         | 0.00                                         | Yes                            | No   | Yes                             |
| 9        | Khojeh Yapaghi    | 1                                           | winter | 500                            | Yes           |         |         |         | 1.72                                         | Yes                            | Yes  | No                              |
| 10       |                   | 1                                           | winter |                                |               |         |         |         |                                              | Yes                            | Yes  |                                 |
| 11       | Kondoskouh        | 1                                           | spring | 1200                           |               | Yes     |         |         | 0.00                                         | Yes                            | Yes  | Yes                             |
| 12       | Orjanli           | 7                                           | winter | 1500                           | Yes           |         |         |         | 1.00                                         | Yes                            | Yes  | Yes                             |
| 13       |                   | 1                                           | autumn |                                |               |         |         |         |                                              | Yes                            | Yes  |                                 |
| 14       |                   | 1                                           | summer |                                |               |         |         |         |                                              | Yes                            | Yes  |                                 |
| 15       |                   | 2                                           | autumn |                                |               |         |         |         |                                              | Yes                            | Yes  |                                 |
| 16       |                   | 2                                           | autumn |                                |               |         |         |         |                                              | Yes                            | Yes  |                                 |
| 17       |                   | 1                                           | autumn |                                |               |         |         |         |                                              | Yes                            | Yes  |                                 |
| 18       |                   | 1                                           | winter |                                |               |         |         |         |                                              | Yes                            | Yes  |                                 |
| 19       | Souvar Bala       | 1                                           | spring | 1000                           | Yes           |         |         |         | 0.00                                         | Yes                            | No   | Yes                             |
| 20       |                   | 6                                           | autumn |                                |               |         |         |         |                                              | Yes                            | Yes  |                                 |
| 21       |                   | 1                                           | winter |                                |               |         |         |         |                                              | Yes                            | Yes  |                                 |
| 22       |                   | 4                                           | winter |                                |               |         |         |         |                                              | Yes                            | No   |                                 |
| 23       |                   | 2                                           | autumn |                                |               |         |         |         |                                              | Yes                            | Yes  |                                 |
| 24       |                   | 2                                           | autumn |                                |               |         |         |         |                                              | Yes                            | Yes  |                                 |
| 25       |                   | 1                                           | autumn |                                |               |         |         |         |                                              | Yes                            | Yes  |                                 |
| 26       |                   | 1                                           | autumn |                                |               |         |         |         |                                              | Yes                            | Yes  |                                 |

| Attack # | Village          | Number of sheep and goats killed per attack | Season | No. living small stock/village | Ethnic groups |         |         |         | Distance from village to protected areas, km | Presence (Yes) or absence (No) |      |                                 |
|----------|------------------|---------------------------------------------|--------|--------------------------------|---------------|---------|---------|---------|----------------------------------------------|--------------------------------|------|---------------------------------|
|          |                  |                                             |        |                                | Turkmen       | Persian | Balochi | Kurdish |                                              | Shepherds                      | Dogs | Previous depredation in village |
| 27       | Souvar Paiin     | 1                                           | spring | 700                            | Yes           |         |         |         | 0.19                                         | Yes                            | Yes  | No                              |
| 28       |                  | 1                                           | summer |                                |               |         |         |         |                                              | Yes                            | Yes  |                                 |
| 29       | Souvar Vassat    | 2                                           | spring | 400                            | Yes           |         |         |         | 0.78                                         | Yes                            | Yes  | Yes                             |
| 30       | Tangerah         | 1                                           | spring | 450                            | Yes           | Yes     | Yes     | Yes     | 0.00                                         | Yes                            | Yes  | Yes                             |
| 31       |                  | 1                                           | winter |                                |               |         |         |         |                                              | Yes                            | Yes  |                                 |
| 32       |                  | 1                                           | winter |                                |               |         |         |         |                                              | Yes                            | Yes  |                                 |
| 33       |                  | 1                                           | spring |                                |               |         |         |         |                                              | Yes                            | Yes  |                                 |
| 34       | Terjenli         | 1                                           | winter | 500                            | Yes           | Yes     | Yes     |         | 0.63                                         | Yes                            | Yes  | Yes                             |
| 35       | Yekeh Ghozz Bala | 1                                           | winter | 3700                           | Yes           |         |         |         | 3.37                                         | No                             | Yes  | No                              |
| 36       |                  | 1                                           | winter |                                |               |         |         |         |                                              | Yes                            | Yes  |                                 |
| 37       | Zav-e-Paiin      | 1                                           | spring | 120                            | Yes           |         |         |         | 0.20                                         | Yes                            | Yes  | Yes                             |
| 38       |                  | 1                                           | spring |                                |               |         |         |         |                                              | Yes                            | Yes  |                                 |
| 39       |                  | 1                                           | autumn |                                |               |         |         |         |                                              | Yes                            | Yes  |                                 |
